# Supplementary material for: Amelioration of Ethanol-Induced Gastric Ulcers in Rats Pretreated with Phycobiliproteins of Arthrospira (Spirulina) Maxima
Source: Nutrients. 2018 Jun 13;10(6):763. doi: 10.3390/nu10060763 (PMC6024796; doi:10.3390/nu10060763)
Supplement: Supplementary file 1 [file nutrients-10-00763-s001.xlsx]

## Sheet: Table S1 supplementary file
Table S1 Additional proteins identified by MALDI-MS/MS
No	Spot No	Accession	Protein	Unused	%Cov	MW (Da)
1	1	tr|B5W7Y1	Elongation factor Tu	44.38	88.5086	44747
2		tr|B5W1S8	Fructose-bisphosphate aldolase, class II	36.18	68.8022	38916
3		tr|B5W5L0	Phosphoglycerate kinase	34.96	74	42047
4		tr|B5VXI0	Ribulose bisphosphate carboxylase large chain	33.16	76.2605	53312
5		tr|B5VUD6	Carbohydrate-selective porin OprB	32.54	67.1569	66418
6		tr|B5VUM8	D-fructose 1,6-bisphosphatase class 2/sedoheptulose 1,7-bisphosphatase	30.89	60	37148
7		tr|B5W6N9	Glucose-1-phosphate adenylyltransferase	28.21	72.0824	49001
8		tr|B5W5Q9	Transketolase	23.03	51.719	72518
9		tr|B5W2F2	Glutathione-disulfide reductase	22.52	78.7472	48288
10		tr|B5VZG4	Adenosylhomocysteinase	20.4	57.277	46509
11		tr|B5W921	Carbohydrate-selective porin OprB	19.9	61.7391	63172
12		tr|B5VXQ5	S-adenosylmethionine synthase	18.39	66.0287	45552
13		tr|B5VXV3	Adenylosuccinate synthetase	18.3	68.8341	48758
14		tr|B5VYX4	Glucose-6-phosphate isomerase	16.14	64.7727	58464
15		tr|B5W3K0	Glutamine synthetase	15.17	67.6533	52871
16		tr|B5VWS8	Serine hydroxymethyltransferase	14.76	54.5667	46435
17		tr|B5W2I0	Acetyl-CoA acetyltransferase	13.43	65.9091	41658
18		tr|B5VUM2	Aminotransferase class I and II	12.58	60.9023	43860
19		tr|B5W7X4	Ribonuclease, Rne/Rng family	12.21	63.7701	82980
20		tr|B5VW52	NAD-dependent epimerase/dehydratase	12.18	67.0077	44340
21		tr|B5W8E7	LL-diaminopimelate aminotransferase	9.94	63.3495	45448
22		tr|B5VW77	Sulfate adenylyltransferase	9.33	40.051	44394
23		tr|B5W4Z9	Carbohydrate-selective porin OprB (Fragment)	9.07	66.7553	41025
24		tr|B5W045	Formamidase OS=Arthrospira maxima	8.86	64.557	43333
25		tr|B5W8E3	ATP phosphoribosyltransferase regulatory subunit	8.84	61.0706	45743
26		tr|B5VUW8	Oxygen-dependent coproporphyrinogen-III oxidase	8.07	45.1149	39808
27		tr|B5W4A4	Enolase	7.82	54.9528	45521
28		tr|B5VWH3	Carboxyl-terminal protease	7.29	70.6311	45703
29		tr|B5VYS2	NAD(P)H-quinone oxidoreductase subunit H	6.84	46.4467	45377
30		tr|B5VWQ3	Glycoside hydrolase family 25	6.74	40.1786	50462
31		tr|B5W0G1	Peptidoglycan-binding domain 1 protein	6.07	64.3519	48821
32		tr|B5W7Y2	Translation elongation factor G (Fragment)	6.07	43.8168	72139
33		tr|B5VY27	3-isopropylmalate dehydrogenase	4.8	52.3416	39012
34		tr|B5W6W5	Isocitrate dehydrogenase [NADP]	4.66	40.678	52480
35		tr|B5VXZ1	3-oxoacyl-[acyl-carrier-protein] synthase 2	4.37	44.9761	43824
36		tr|B5W882	CopG-like DNA-binding	4.35	58.7242	60815
37		tr|B5VZE8	4-alpha-glucanotransferase	4.27	36.8317	57982
38		tr|B5W3B3	ATP synthase subunit beta	4.2	46.1856	52384
39		tr|B5W113	Glycogen synthase	4.13	33.6842	54550
40		tr|B5VUD0	Dihydroxy-acid dehydratase	3.01	39.8214	59050
41		tr|B5W509	ABC-type nitrate/nitrite transport system substrate-binding protein	2.71	31.25	48548
42		tr|B5W2M7	Phosphoglycerate mutase	2.67	33.2589	50381
43		tr|B5VWR9	Dihydroorotase	2.56	22.7991	48394
44		tr|B5VUL8	Alpha amylase catalytic region	2.47	34.1513	57157
45		tr|B5W858	Uncharacterized protein	2.18	41.0604	84953
46		tr|B5W4M6	Aspartokinase	2.14	35.2554	65121
47		tr|B5W5Q1	Small GTP-binding protein	2.09	36.5994	76481
48		tr|B5W9B8	OpcA protein	2.09	23.0248	49343
49		tr|B5W5S8	Photosystem I P700 chlorophyll a apoprotein A2	2.05	26.4507	83386
50		tr|B5W2W0	Uncharacterized protein	2.05	28.9855	56941
51		tr|B5W5U9	Dihydrolipoyl dehydrogenase	2.04	38.171	53656
52		tr|B5W7J4	Phosphoglucomutase/phosphomannomutase alpha/beta/alpha domain I	2.04	17.9337	55556
53		tr|B5VW31	Peptidase S8 and S53 subtilisin kexin sedolisin	2.01	37.6518	80078
54		tr|B5W3T8	Histidine--tRNA ligase	2.01	46.2585	49500
55		tr|B5VWQ9	Thiamine pyrophosphate protein TPP binding domain protein	2.01	29.1743	59453
56		tr|B5VXQ8	Ferritin Dps family protein	2.01	35.7955	19562
57		tr|B5VXZ6	Photosystem II CP47 reaction center protein	2	41.0609	56244
58		tr|B5W2H1	Glycine oxidase ThiO	2	34.8774	40263
59		tr|B5W7S4	FeS assembly ATPase SufC	1.72	8.84615	28699
60		tr|B5W2W9	ATP synthase subunit alpha	1.65	41.3861	54398
61		tr|B5W8K3	4-alpha-glucanotransferase	1.34	34.1948	58512
62	2	tr|B5W0K5	Redoxin domain protein	9.11	40.8046	19621
63		tr|C7DT11	CpcI	2	52.7778	32644
64		tr|B5VYG2	Elongation factor Ts	1.52	47.2727	24404
65		tr|B5VU73	Uncharacterized protein	1.4	12.6829	22941
66	3	tr|B5VXW7	Uncharacterized protein	12.1	74.1176	19130
67		tr|B5W6T7	6,7-dimethyl-8-ribityllumazine synthase	6.66	39.801	21763
68		tr|B5VXV9	Uncharacterized protein	6	34.0136	16730
69		tr|B5VYY2	Phosphoenolpyruvate synthase	4.88	30.9809	92710
70		tr|B5VUU0	Peptidyl-prolyl cis-trans isomerase	4.06	34.715	20464
71		tr|B5W3P8	Uncharacterized protein	4.05	50	14893
72		tr|B5W941	Hydrophobic protein	4	45.0602	44833
73		tr|B5W0H0	Alkyl hydroperoxide reductase/ Thiol specific antioxidant/ Mal allergen	3.71	34.0278	15640
74		tr|B5W3J5	Uncharacterized protein	2.52	25	18242
75		tr|B5W104	3-hydroxyacyl-[acyl-carrier-protein] dehydratase FabZ	2.13	23.1707	18300
76		tr|B5W6K2	Nucleoside diphosphate kinase	2.09	50.3356	16574
77		tr|B5W3C7	ABC transporter related	2.03	34.6211	74921
78		tr|B5W2P1	Acetolactate synthase, small subunit	2.02	42.8571	19199
79		sp|P83689	Orange carotenoid-binding protein	2	29.0221	35348
80		tr|B5W927	Transcriptional regulator, AbrB family	1.87	34.7826	15427
81		tr|B5W6L2	Uncharacterized protein	1.7	33.1288	19070
82		tr|B5W130	Uncharacterized protein	1.52	23.1707	17858
83		tr|B5W7B0	Peptidase M23	1.36	49.2063	27831
84	4	tr|B5W382	Flavin reductase domain protein FMN-binding	4	39.6226	17378
85		tr|B5W5Y8	Clp domain protein OS=Arthrospira maxima CS-328	2.02	58.7065	44060
86		tr|B5W9E5	Gas vesicle protein GvpC	2.01	48.2394	32471
87		tr|B5W4G4	Uncharacterized protein	2	16.7665	18459
88		tr|B5VZV4	Thioredoxin	2	36.4486	11806
89		tr|B5W8Q4	Uncharacterized protein	2	14.7727	19424
90		tr|B5W537	Flavin reductase domain protein FMN-binding	1.7	20.8981	63891
No, number; %Cov, %coverture; MW (Da), molecular weight (daltons); MALDI-MS/MS, matrix-assisted laser desorption/ionization mass spectrometry.
